# Supplementary material
Source: PubMed Central journal article supplement (PMC3655439)
Supplement: NIHMS435056-supplement-01.pdf [file NIHMS435056-supplement-01.pdf]

Figure S1: Hematoxylin and eosin staining of tissue sections from 12-month-old control and LIRKO mice

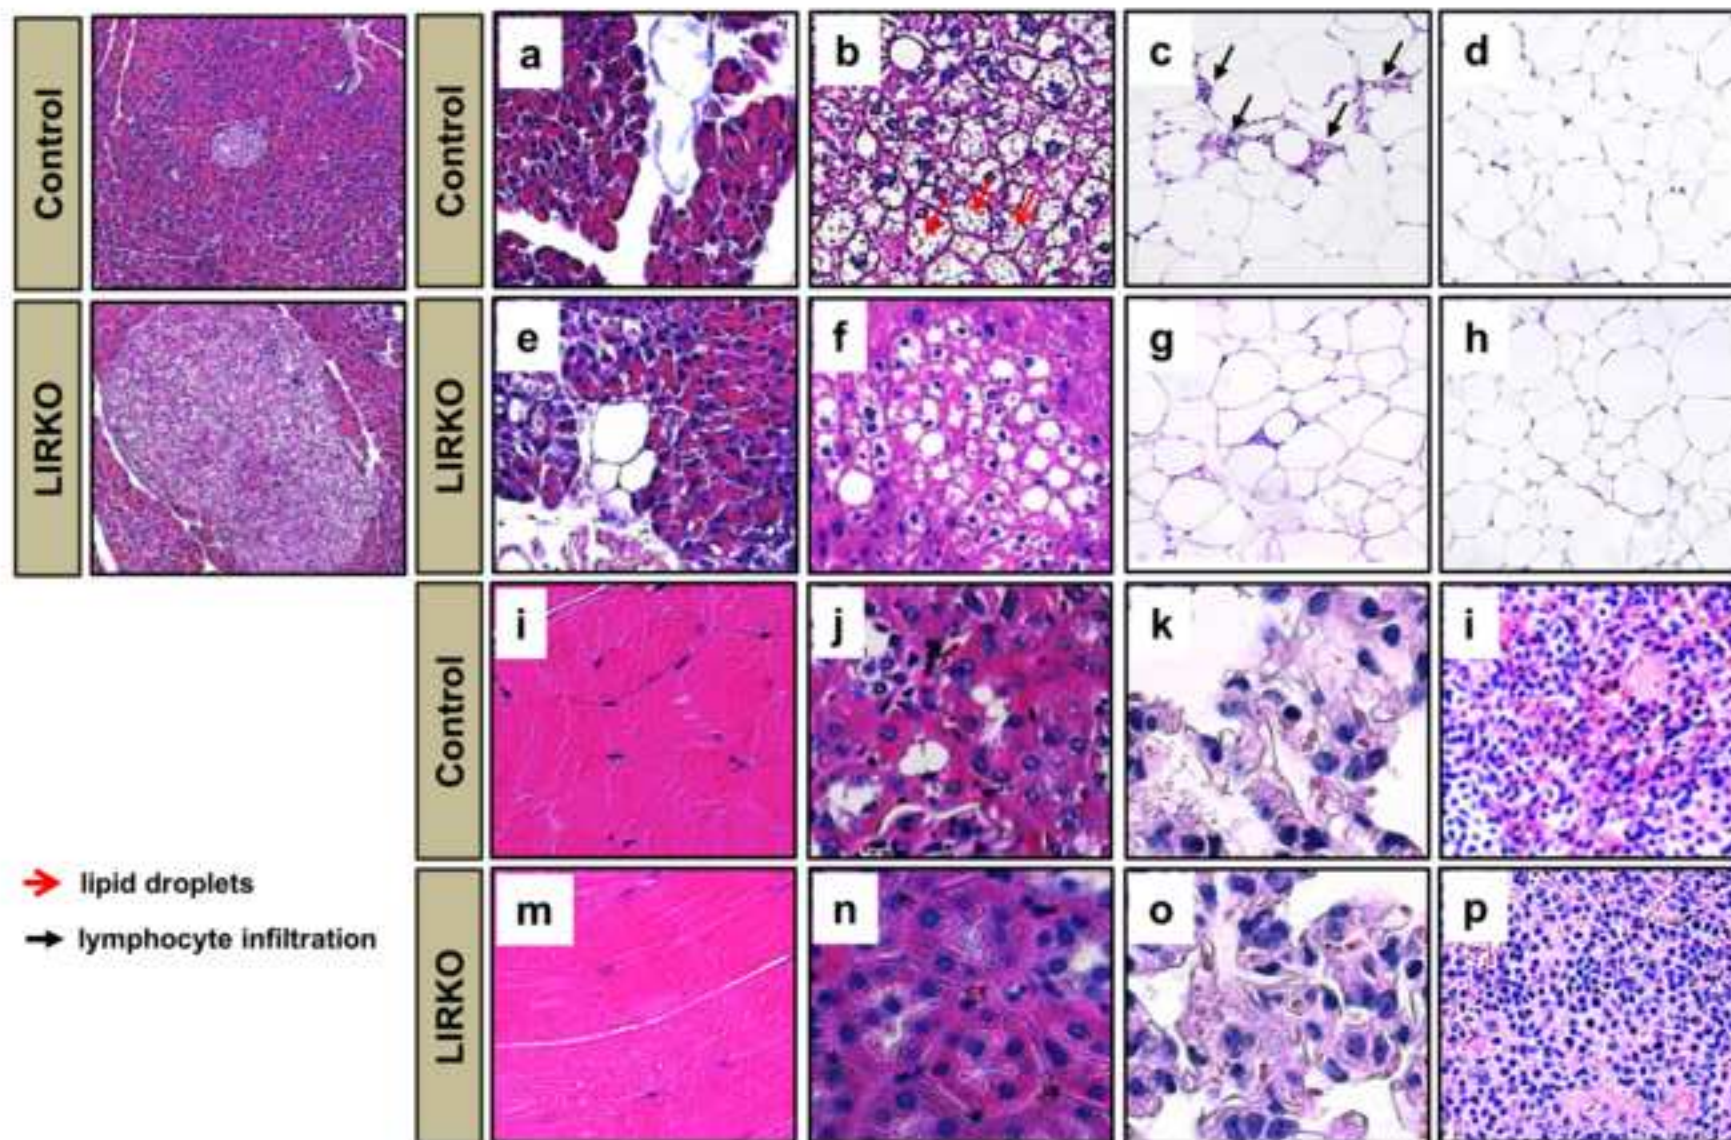

pancreas: a, e. liver: b,f. visceral adipose: c, g. subcutaneous adipose: d, h skeletal muscle: i, m. kidney: j, n. lung: k, o. spleen: l, p .

Figure S2: Weekly monitoring of body weight and blood glucose in parabionts

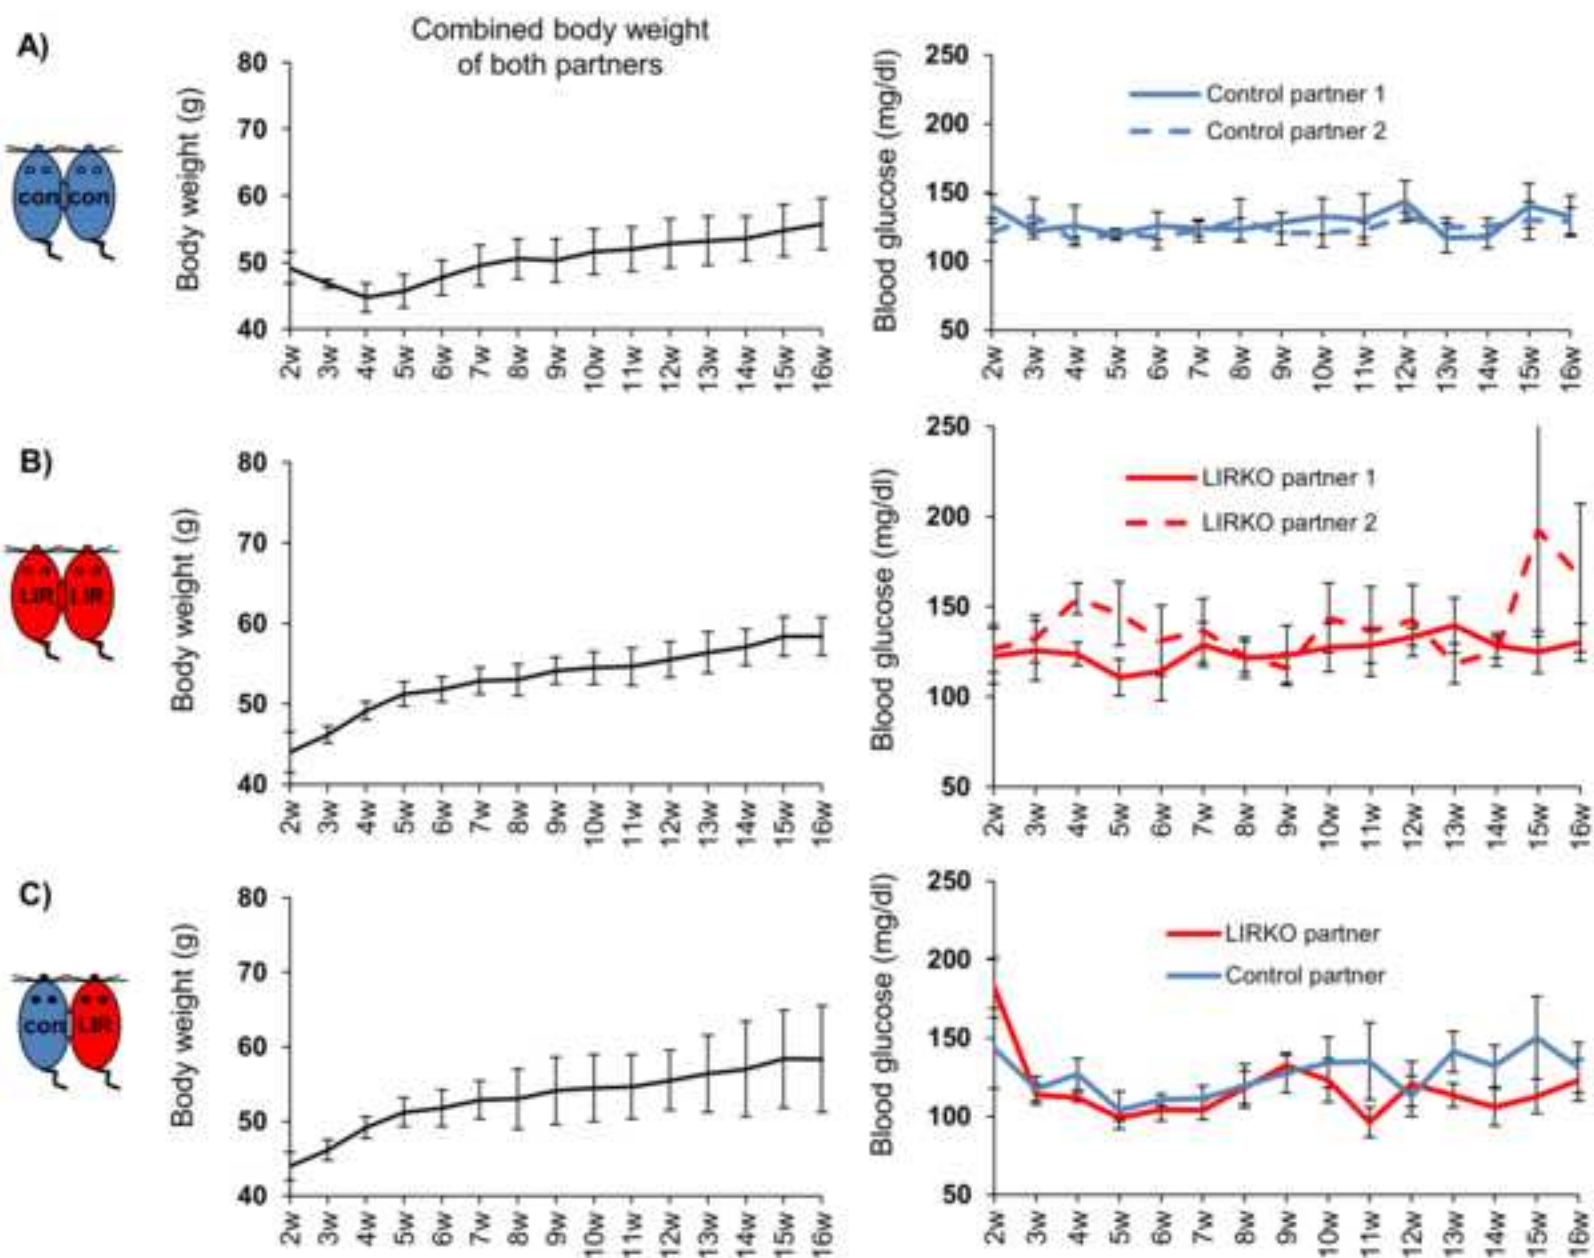

Figure S3: Blood glucose and insulin assays in parabiont pairs pre- and post-surgery

Blood glucose and insulin levels  
"pre-surgery"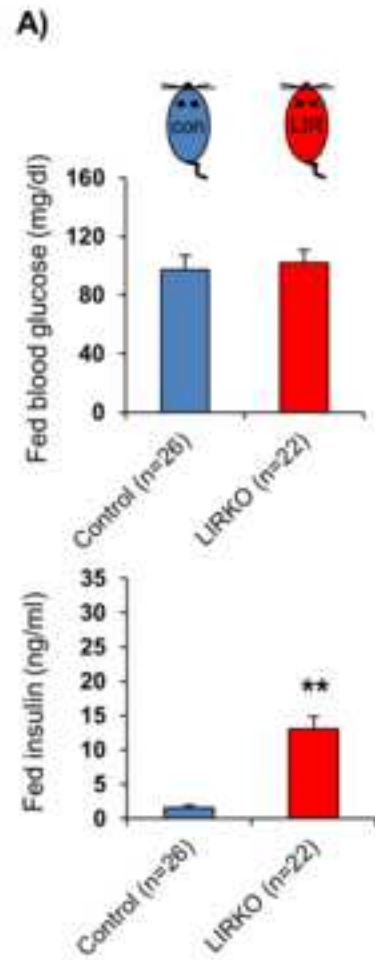Blood glucose and insulin levels  
16-weeks "post-surgery"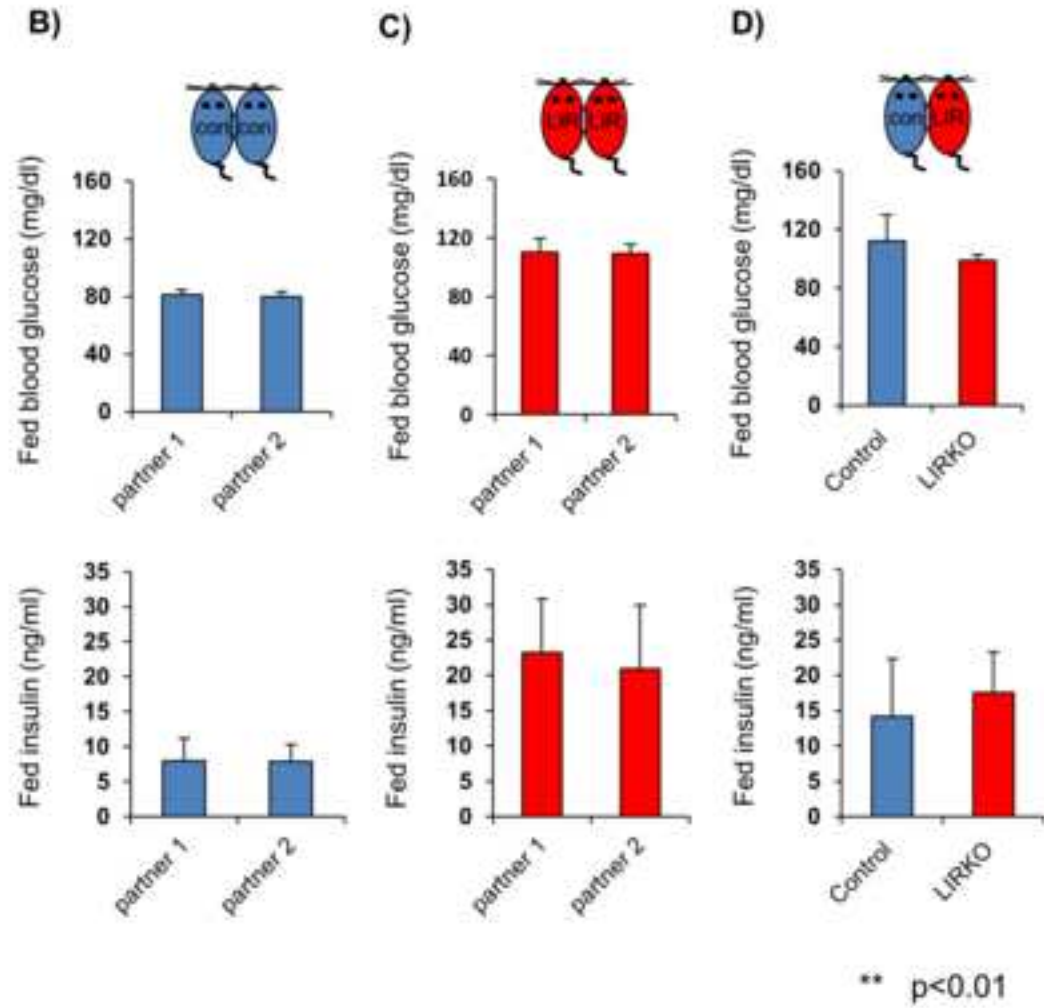

**Figure S4:** Quantification of pHH3+ insulin+ cells in parabiosis experiments. Single and parabiont animals were sacrificed and pancreases were dissected and immunostained with insulin, pHH3 and DAPI. \*\*  $p < 0.01$   $n = 5-6$

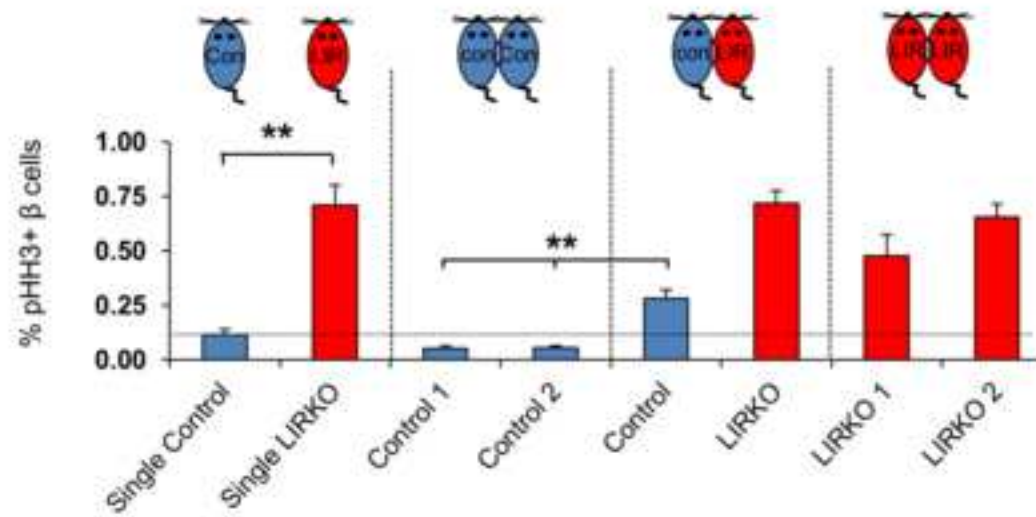

**Figure S5:** Quantification of Ki67+ insulin+ cells in serum-stimulated mouse islets. Islets were incubated for 24 or 48h with serum (diluted 1:10) from 3-month-old control or LIRKO animals. \*  $p < 0.05$   $n = 4-5$

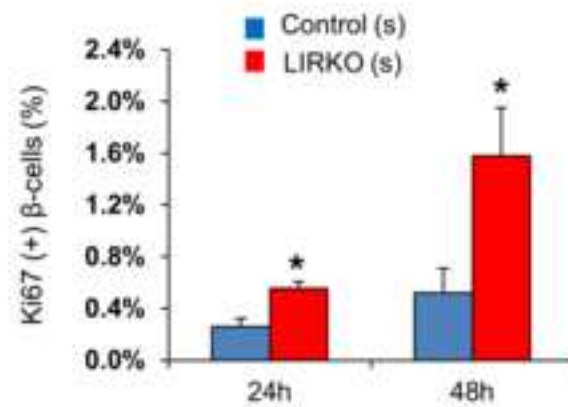

Figure S6: Glucose and insulin assays in culture media

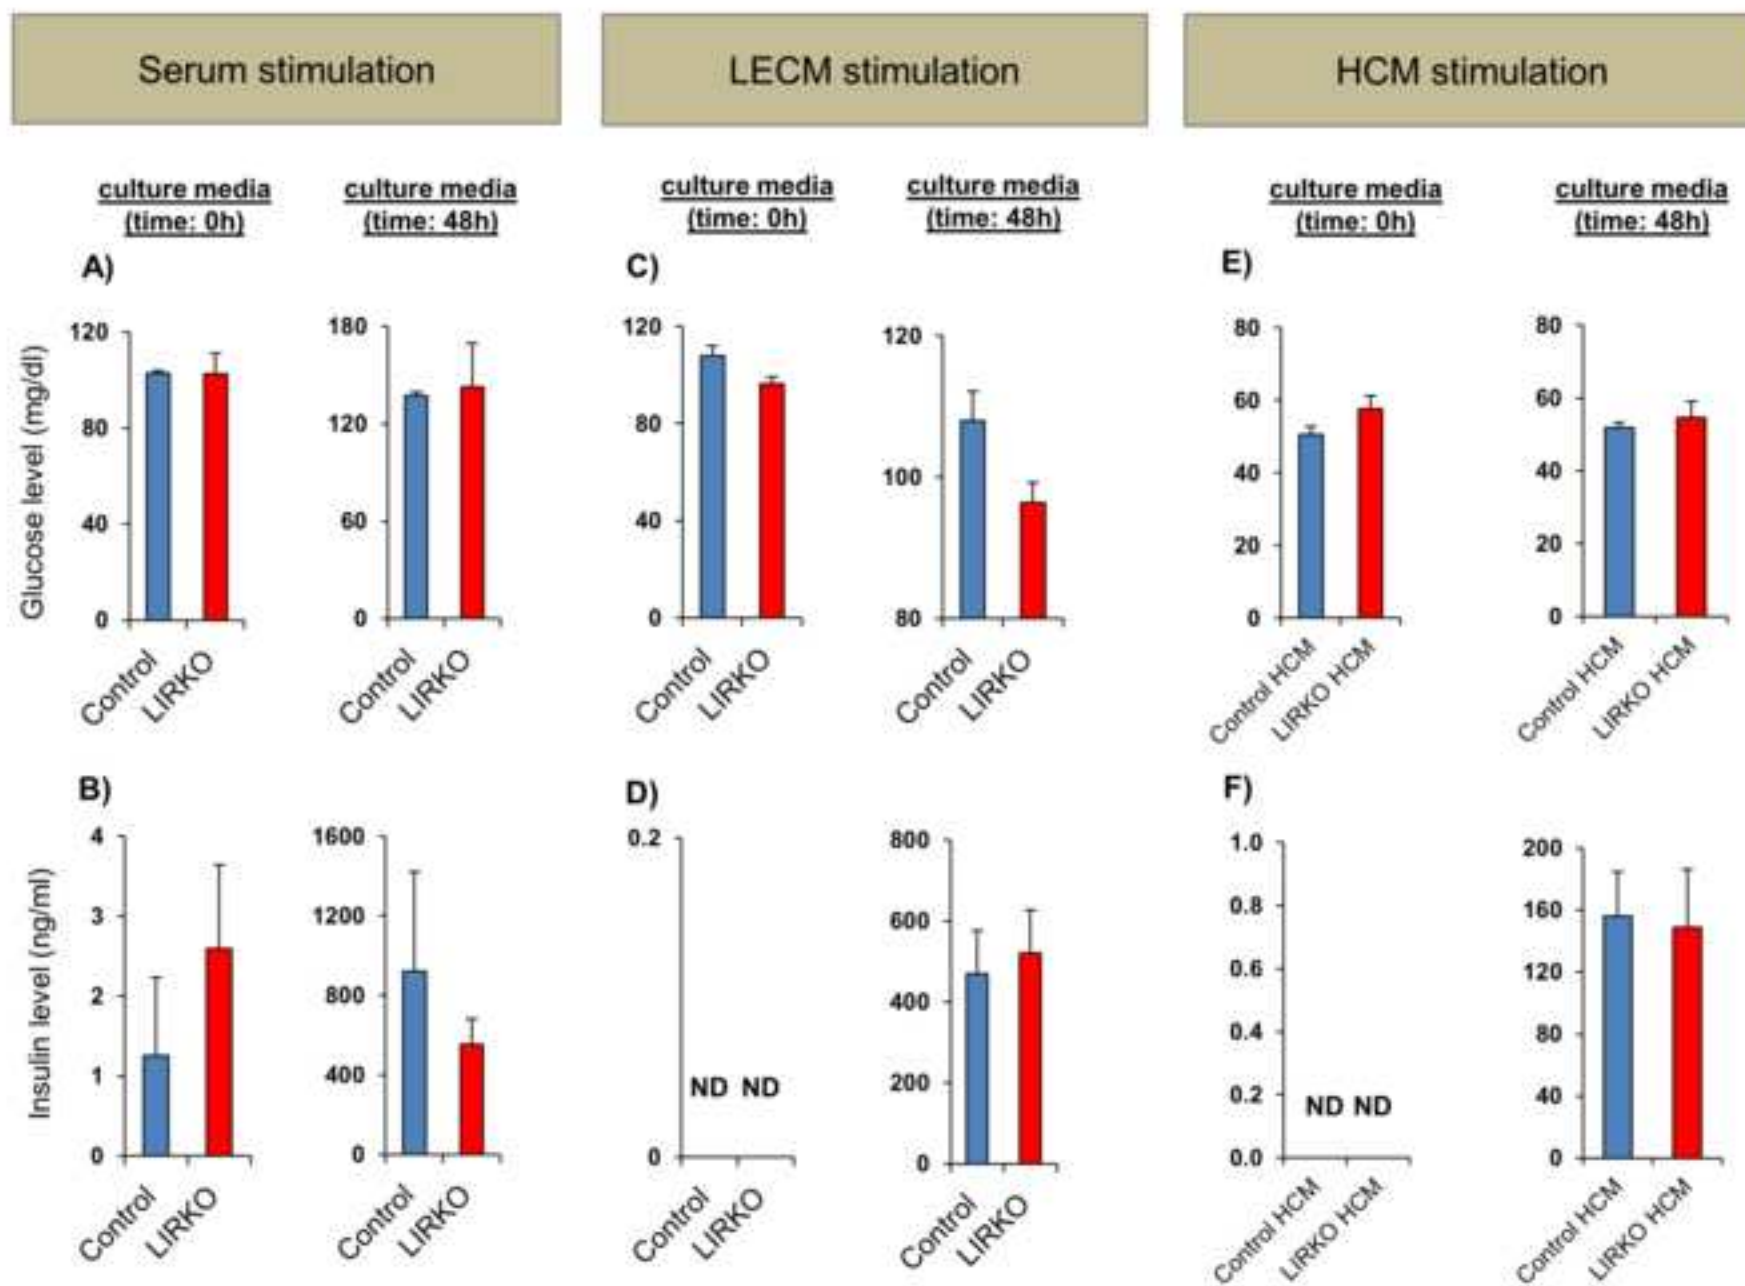

**Table S1:** Assays of circulating growth factors, hormones, cytokines and chemokines in young vs. old Control and LIRKO mice.

|                                   | Control (3Mo) | LIRKO (3Mo)  | p             | Control (12Mo) | LIRKO (12Mo)  | p               |
|-----------------------------------|---------------|--------------|---------------|----------------|---------------|-----------------|
| <b>Growth factors</b>             |               |              |               |                |               |                 |
| IGF1 (ng/mL)                      | 211.9 ± 18.9  | 68.9 ± 16.6  | <b>0.0002</b> | 525.1 ± 35.6   | 194.4 ± 18.6  | <b>2.91E-06</b> |
| HGF (ng/mL)                       | 5.3 ± 0.41    | 4 ± 0.69     | 0.145         | 2.1 ± 0.3      | 4.3 ± 0.8     | <b>0.03</b>     |
| EGF (ng/mL)                       | 54.75 ± 17.33 | 79.8 ± 23.73 | 0.4           | 11.7 ± 3.1     | 14.5 ± 6.1    | 0.7             |
| PDGFAA (ng/mL)                    | 0.142 ± 0.05  | 0.163 ± 0.05 | 0.88          | 3.4 ± 0.4      | 3.6 ± 0.4     | 0.7             |
| PDGFBB (ng/mL)                    | 0.073 ± 0.02  | 0.17 ± 0.07  | 0.22          | 9 ± 1.5        | 9.8 ± 1.2     | 0.6             |
| VEGF (pg/mL)                      | 2.1 ± 0.2     | 1.3 ± 0.1    | <b>0.006</b>  | 1.8 ± 0.3      | 2.1 ± 0.4     | 0.5             |
| FGF21 (pg/mL)                     | 58.6 ± 12.6   | 43.6 ± 11.1  | 0.4           | 1203 ± 224.6   | 143.2 ± 29.3  | <b>0.001</b>    |
| <b>Hormones</b>                   |               |              |               |                |               |                 |
| Insulin (ng/mL)                   | 2.3 ± 0.7     | 11.6 ± 2.4   | <b>0.01</b>   | 8.2 ± 1        | 17.8 ± 4.4    | <b>0.06</b>     |
| Amylin (pg/mL)                    | 103.6 ± 40.9  | 206.6 ± 51.1 | 0.1           | 358.4 ± 38     | 900.8 ± 309.6 | 0.1             |
| Glucagon (pM)                     | 25.8 ± 3.4    | 20.9 ± 4.8   | 0.4           | 13.1 ± 3.9     | 11.5 ± 3.8    | 0.8             |
| Ghrelin (pg/mL)                   | 3.5 ± 0.5     | 2.5 ± 0.4    | 0.1           | 1.7 ± 0        | 4.5 ± 1.9     | 0.2             |
| PP (pg/mL)                        | 11.8 ± 2.9    | 19.7 ± 4     | 0.1           | 18 ± 4.8       | 42.2 ± 17.4   | 0.2             |
| PYY (pg/mL)                       | 63.1 ± 12     | 74.8 ± 13    | 0.5           | 145.9 ± 38.3   | 86.7 ± 7.6    | 0.2             |
| GIP (pg/mL)                       | 108.5 ± 11.4  | 152.9 ± 18.7 | 0.06          | 284.5 ± 25     | 95.2 ± 13.9   | <b>2.1E-05</b>  |
| Total GLP-1 (pg/mL)               | 32.1 ± 5      | 43.6 ± 11.6  | 0.4           | 59.4 ± 11.4    | 65.9 ± 17.9   | 0.7             |
| Active GLP-1 (pg/mL)              | 23.6 ± 7.4    | 22.5 ± 6.3   | 0.9           | 25.5 ± 7.6     | 27.7 ± 9.8    | 0.8             |
| Leptin (ng/mL)                    | 12.3 ± 4      | 8.9 ± 1.7    | 0.4           | 42.9 ± 6.2     | 27.7 ± 1.7    | <b>0.04</b>     |
| Resistin (ng/mL)                  | 2.4 ± 0.2     | 2.7 ± 0.2    | 0.3           | 1.3 ± 0.1      | 1.5 ± 0.1     | 0.2             |
| Adiponectin (µg/mL)               | 10.9 ± 1.4    | 17.5 ± 2.6   | <b>0.04</b>   | 21.2 ± 2.3     | 18.8 ± 1.3    | 0.4             |
| Osteopontin (ng/mL)               | 146.2 ± 8.1   | 157.1 ± 24.6 | 0.7           | 161.3 ± 16.9   | 232.1 ± 20.5  | <b>0.01</b>     |
| Osteocalcin (ng/mL)               | 12.6 ± 1.2    | 12.6 ± 2.9   | 1             | 11.8 ± 2.2     | 12.9 ± 2.7    | 0.8             |
| Gastrin (pg/mL)                   | 39.4 ± 2.3    | 43.1 ± 4.6   | 0.5           | 45.7 ± 6.2     | 40.9 ± 5.9    | 0.6             |
| <b>Cytokines &amp; Chemokines</b> |               |              |               |                |               |                 |
| IL-1a (pg/mL)                     | 12.4 ± 2.7    | 14.3 ± 6.4   | 0.8           | 9.4 ± 3.6      | 21.2 ± 8.4    | 0.2             |
| IL-1b (pg/mL)                     | 6.6 ± 2.9     | 3.2 ± 0.6    | 0.3           | 3.3 ± 0.4      | 5.8 ± 2.5     | 0.3             |
| IL-2 (pg/mL)                      | 1.4 ± 0.1     | 1.2 ± 0.05   | 0.1           | 1.3 ± 0.3      | 1.5 ± 0.2     | 0.6             |
| IL-3 (pg/mL)                      | 1.4 ± 0.07    | 1.3 ± 0.1    | 0.6           | 1.4 ± 0        | 2.36 ± 1      | 0.3             |
| IL-4 (pg/mL)                      | 0.7 ± 0.04    | 0.9 ± 0.2    | 0.4           | 0.8 ± 0.35     | 0.5 ± 0.04    | 0.4             |
| IL-5 (pg/mL)                      | 7.3 ± 1.8     | 8.3 ± 2.1    | 0.7           | 2.7 ± 1.2      | 1.9 ± 0.9     | 0.6             |
| IL-6 (pg/mL)                      | 3.4 ± 1.4     | 2.8 ± 1.6    | 0.7           | 27.8 ± 3.4     | 19.4 ± 2.3    | 0.06            |
| IL-7 (pg/mL)                      | 1.4 ± 0.2     | 3.5 ± 1.8    | 0.2           | 17.5 ± 0.1     | 15 ± 0.8      | 0.8             |
| IL-9 (pg/mL)                      | 13.6 ± 4.2    | 9.1 ± 2.9    | 0.4           | 3.5 ± 1        | 7.9 ± 4.3     | 0.3             |
| IL-10 (pg/mL)                     | 11.8 ± 1.4    | 9.7 ± 1.6    | 0.3           | 11.2 ± 2.5     | 12.6 ± 3.5    | 0.7             |
| IL-12(P40) (pg/mL)                | 16.7 ± 2.5    | 10.2 ± 2.5   | 0.08          | 6.3 ± 2.2      | 4.3 ± 1       | 0.4             |
| IL-12 (p70) (pg/mL)               | 10.5 ± 2.6    | 9.3 ± 2.9    | 0.7           | 10.2 ± 7.3     | 6.3 ± 2.1     | 0.6             |
| IL-13 (pg/mL)                     | 103.4 ± 12.7  | 84.6 ± 14.6  | 0.3           | 83.8 ± 12.7    | 134.1 ± 33.2  | 0.2             |
| IL-15 (pg/mL)                     | 7.7 ± 2.2     | 12.5 ± 1.7   | 0.5           | 35.7 ± 1.8     | 48 ± 29.4     | 0.7             |
| IL-17 (pg/mL)                     | 1.3 ± 0.2     | 0.9 ± 0.3    | 0.2           | 2.5 ± 1        | 1.4 ± 0.3     | 0.3             |
| IFN-g (pg/mL)                     | 2.9 ± 0.6     | 2 ± 0.2      | 0.2           | 3 ± 2.1        | 1.1 ± 0.2     | 0.4             |
| TNF-a (pg/mL)                     | 2.4 ± 0.5     | 2 ± 0.5      | 0.5           | 2.9 ± 0.08     | 4.7 ± 1.6     | 0.3             |
| PAI-1 (ng/mL)                     | 1.4 ± 0.2     | 1.3 ± 0.1    | 0.5           | 1.6 ± 0.3      | 1.3 ± 0.3     | 0.3             |
| G-CSF (pg/mL)                     | 217.6 ± 40.7  | 120.6 ± 25   | 0.06          | 243.8 ± 51.9   | 169.1 ± 41.5  | 0.3             |
| GM-CSF (pg/mL)                    | 12.7 ± 3.4    | 11.2 ± 4.3   | 0.8           | ND             | ND            | ND              |
| M-CSF (pg/mL)                     | 10.3 ± 3.4    | 4.4 ± 1.2    | 0.1           | 5.2 ± 3        | 5.3 ± 2.5     | 1               |
| KC (pg/mL)                        | 84.1 ± 24.7   | 91.8 ± 11.8  | 0.8           | 47.2 ± 10.3    | 37.4 ± 8.7    | 0.5             |
| IP-10 (pg/mL)                     | 92.8 ± 10.6   | 68.9 ± 9.5   | 0.1           | 178.8 ± 20.5   | 167.3 ± 15    | 0.6             |
| Eotaxin (pg/mL)                   | 344.6 ± 23.4  | 342.4 ± 39.4 | 1             | 295.8 ± 19.1   | 337.1 ± 42    | 0.4             |
| MCP-1 (pg/mL)                     | 9.9 ± 1.6     | 5.4 ± 0.8    | <b>0.04</b>   | 3.9 ± 0.4      | 5.8 ± 2.4     | 0.5             |
| MIP-1a (pg/mL)                    | 16.3 ± 4      | 11 ± 3.9     | 0.3           | 11.6 ± 2.8     | 7.9 ± 3.6     | 0.4             |
| MIP-1b (pg/mL)                    | 24.8 ± 4.7    | 13.6 ± 4     | 0.08          | 17.6 ± 5.2     | 14.3 ± 5.1    | 0.6             |
| MIP-2 (pg/mL)                     | 6.07 ± 1.5    | 6.07 ± 1.5   | 0.9           | ND             | ND            | ND              |
| MIG (pg/mL)                       | 131.3 ± 18.6  | 129 ± 18.7   | 0.9           | 156.3 ± 28.3   | 108.5 ± 17.1  | 0.2             |
| RANTES (pg/mL)                    | 13.9 ± 1.7    | 10.3 ± 3     | 0.3           | 5.5 ± 1.4      | 11.9 ± 2.1    | <b>0.03</b>     |
| LIX (ng/mL)                       | 0.9 ± 0.3     | 0.7 ± 0.2    | 0.7           | 0.3 ± 0.1      | 0.4 ± 0.1     | 0.7             |

**Table S2:** Histological characteristics of Control and LIRKO mice

|                             | <b>Control</b>                 | <b>LIRKO</b>                                         |
|-----------------------------|--------------------------------|------------------------------------------------------|
| <b>Pancreas</b>             | mild pancreatitis              | very mild pancreatitis                               |
| <b>Liver</b>                | severe steatosis               | no steatosis + focal dysplasia+ hyperplastic nodules |
| <b>Skeletal muscle</b>      | normal                         | normal                                               |
| <b>Visceral adipose</b>     | severe lymphocyte infiltration | mild lymphocyte infiltration                         |
| <b>Subcutaneous adipose</b> | normal                         | normal                                               |
| <b>Spleen</b>               | normal                         | normal                                               |
| <b>Kidney</b>               | normal                         | normal                                               |
| <b>Lung</b>                 | normal                         | normal                                               |



Table S3: Islet-donor characteristics

| UNOS ID | Donor | Gender  | Ethnicity/Race   | Age (years) | BMI  | Diabetic donor status | Experiment             |
|---------|-------|---------|------------------|-------------|------|-----------------------|------------------------|
| XHU114  | 1     | Male    | White            | 55          | 20.1 | No                    | stimulation with serum |
| XHV125  | 2     | Male    | White            | 23          | 25.6 | No                    | stimulation with serum |
| XHW271  | 3     | Female  | White            | 18          | 26.4 | No                    | stimulation with serum |
| XJW381  | 4     | Male    | Hispanic/Latino  | 25          | 29.3 | No                    | stimulation with serum |
| XFK479  | 5     | Male    | Hispanic/Latino  | 50          | 26.5 | No                    | stimulation with serum |
| XKJ390  | 6     | Unkown  | Unkown           | 64          | 30   | No                    | stimulation with serum |
| XLT243  | 7     | Female  | African american | 41          | 42   | No                    | stimulation with serum |
| YD3485  | 8     | Male    | White            | 54          | 19.5 | No                    | stimulation with serum |
| YEC248  | 9     | Male    | African american | 20          | 31.3 | No                    | stimulation with serum |
| XLK052  | 10    | Male    | Unknown          | 53          | 31   | T2D                   | stimulation with serum |
| XHK168A | 11    | Female  | White            | 38          | 37.8 | T2D on metformin      | stimulation with serum |
| YAL054  | 12    | Unknown | Unknown          | 65          | 31   | No                    | stimulation with LECM  |
| YAJ498A | 13    | Unknown | Unknown          | 54          | 34   | T2D                   | stimulation with LECM  |
| YBG327  | 14    | Male    | White            | 52          | 50   | T2D                   | stimulation with HCM   |
